# Supplementary material for: Optimizing Gō-MARTINI Coarse-Grained Model for F-BAR Protein on Lipid Membrane
Source: PubMed Central journal article supplement (PMC7937874; doi:10.3389/fmolb.2021.619381), 2021-02-22
Supplement: datasheet1.pdf [file datasheet1.pdf]

## Supplementary Material

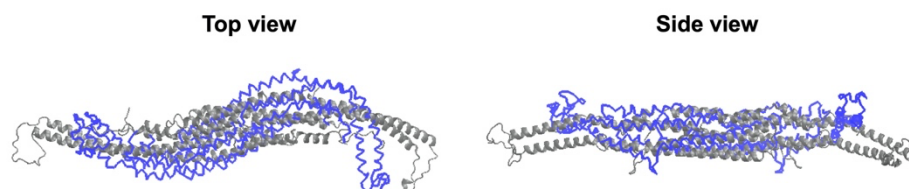

**Supplementary Figure 1.** Final snapshots of Pacsin1 from the Gō-MARTINI (OV+rCSU) simulation are shown from the top and side views in blue, while those of Pacsin1 from the all-atom simulation are also shown in gray.

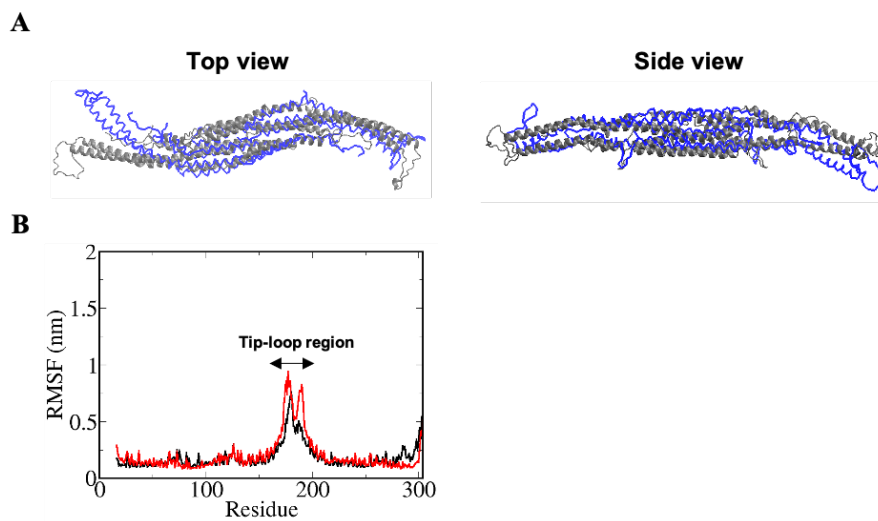

**Supplementary Figure 2.** (A) Final snapshots of Pacsin1 from the Gō-MARTINI (cutoff 5.0 Å and  $\lambda = 1.5$ ) simulation are shown from the top and side views, while those of Pacsin1 from the all-atom simulation are also shown in gray. (B) The RMSF result from the Gō-MARTINI (cutoff 5.0 Å and  $\lambda = 1.5$ ) simulation is shown. For the RMSF calculation, the last half of the trajectories was used. Black and red lines represent chain A and B, respectively. Arrows indicates the tip-loop region in chain A and B.

## Supplementary Material

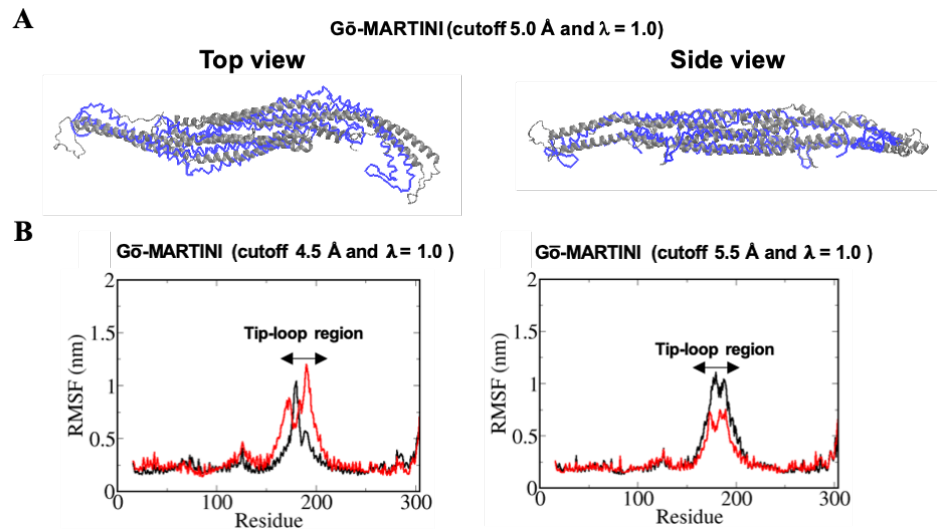

**Supplementary Figure 3.** (A) Final snapshots of Pacsin1 from the Gō-MARTINI (cutoff 5.0 Å and  $\lambda = 1.0$ ) simulation are shown from the top and side views, while those of Pacsin1 from the all-atom simulation are also shown in gray. (B) The RMSF results from Gō-MARTINI (cutoff 4.5 Å and  $\lambda = 1.0$ ) and Gō-MARTINI (cutoff 5.5 Å and  $\lambda = 1.0$ ) simulations are shown. For the RMSF calculation, the last half of the trajectories was used. Black and red lines represent chain A and B, respectively. Arrows indicates the tip-loop region in chain A and B.

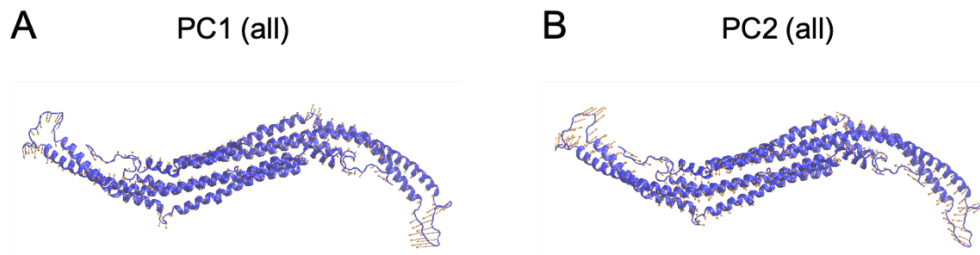

**Supplementary Figure 4.** (A) The common PC1 eigenvector is shown on Pacsin1 structure. (B) The common PC2 eigenvector is shown on Pacsin1 structure.

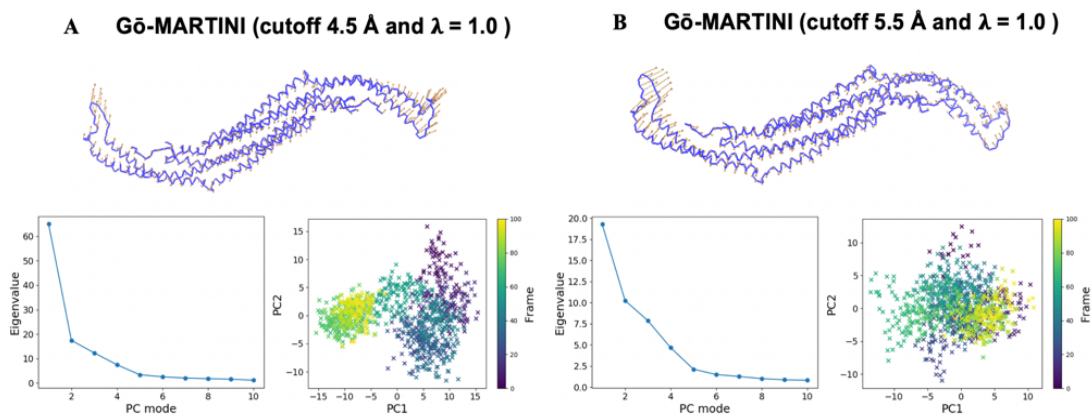

**Supplementary Figure 5.** Principle component analysis of the Pacsin1 structural fluctuations. For **(A)** Gō-MARTINI (cutoff 4.5 Å and  $\lambda = 1.0$ ) and **(B)** Gō-MARTINI (cutoff 5.5 Å and  $\lambda = 1.0$ ) simulations, the first principal component (PC1) eigenvector on the Pacsin1 structure, the eigenvalue profile along the principal component modes, and mapping of the Pacsin1 conformations on the PC1-PC2 surface are shown.

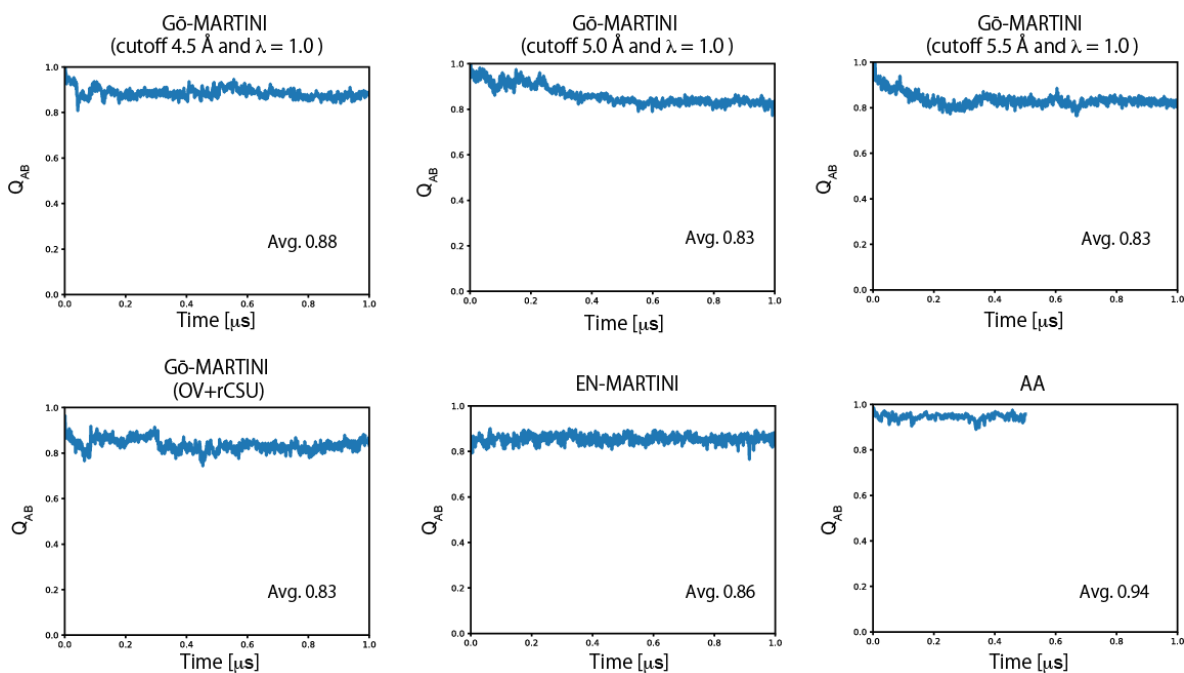

**Supplementary Figure 6.** The fraction of the virtual native contacts at the interface between chain A and chain B present during simulations of the tested Gō-MARTINI and EN-MARTINI models as well as the AA model. The average value of  $Q_{AB}$  from the last half of the simulations is shown in the inset.

## Supplementary Material

| Model                               | EN-MARTINI | Gō-MARTINI<br>(OV+rCSU) | Gō-MARTINI<br>(cutoff 4.5 Å) | Gō-MARTINI<br>(cutoff 5.0 Å) | Gō-MARTINI<br>(cutoff 5.5 Å) |
|-------------------------------------|------------|-------------------------|------------------------------|------------------------------|------------------------------|
| Number of native contacts (chain A) | 2668       | 469                     | 757 (96.8% overlap)          | 856 (98.5% overlap)          | 1021 (99.4% overlap)         |
| Number of native contacts (chain B) | 2646       | 461                     | 746 (97.4% overlap)          | 843 (97.7% overlap)          | 1009 (98.2% overlap)         |

**Supplementary Table 1:** Number of native contacts in different Gō-MARTINI and EN-MARTINI models. Numbers in parenthesis indicate percentage of the overlapped native contacts from the Gō-MARTINI (OV+rCSU).
